# Supplementary material for: Conjugate vaccine serotypes persist as major causes of non-invasive pneumococcal pneumonia in Portugal despite declines in serotypes 3 and 19A (2012-2015)
Source: PubMed Central journal article supplement (PMC6214563; doi:10.1371/journal.pone.0206912), 2018-11-02
Supplement: pone.0206912.s002.pdf [file pone.0206912.s002.pdf]

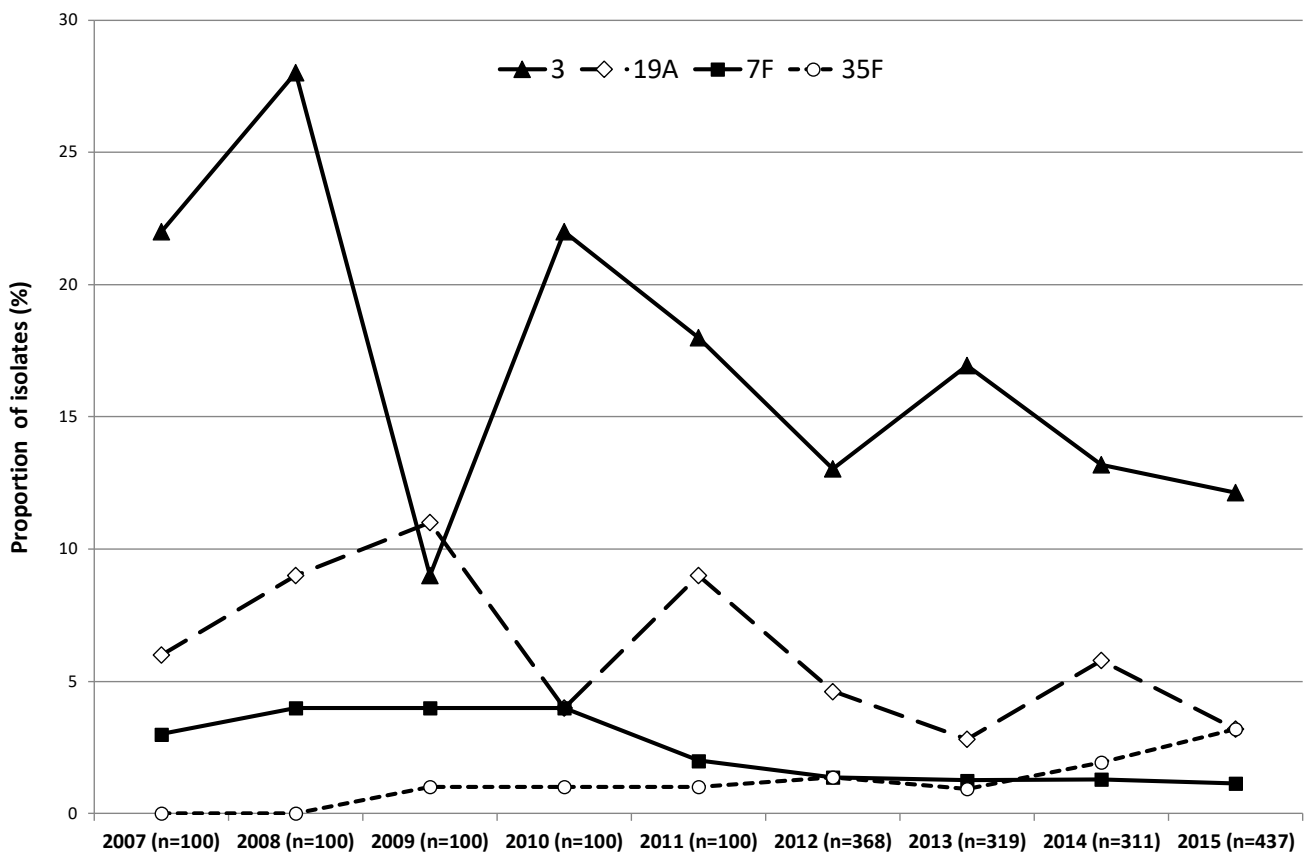

**S2 Fig. Isolates expressing serotypes that changed in proportion after FDR correction causing non-invasive pneumococcal pneumonia in adult patients ( $\geq 18$  years) in Portugal, 2007–2015. The data up to 2011 were presented previously [14].**
