# Supplementary material for: Conjugate vaccine serotypes persist as major causes of non-invasive pneumococcal pneumonia in Portugal despite declines in serotypes 3 and 19A (2012-2015)
Source: PubMed Central journal article supplement (PMC6214563; doi:10.1371/journal.pone.0206912), 2018-11-02
Supplement: pone.0206912.s003.pdf [file pone.0206912.s003.pdf]

**S1 Table. Serotypes of the isolates responsible for non-invasive pneumococcal pneumonia in adult patients (≥18 years), 2007–2011.** These data were presented previously [14].

| Serotype <sup>a</sup> | No. of isolates |      |      |      |      | CA <sup>b</sup>  |
|-----------------------|-----------------|------|------|------|------|------------------|
|                       | 2007            | 2008 | 2009 | 2010 | 2011 | 2007-2015        |
| <b>PCV13</b>          |                 |      |      |      |      |                  |
| 1                     | 0               | 0    | 3    | 2    | 1    | 0.039            |
| 3                     | 22              | 28   | 9    | 22   | 18   | <b>&lt;0.001</b> |
| 4                     | 1               | 0    | 0    | 1    | 1    | 0.776            |
| 5                     | 0               | 0    | 2    | 0    | 0    | 0.041            |
| 6A                    | 3               | 3    | 2    | 4    | 3    | 0.342            |
| 6B                    | 3               | 1    | 0    | 1    | 0    | 0.926            |
| 7F                    | 3               | 4    | 4    | 4    | 2    | <b>0.004</b>     |
| 9V                    | 3               | 0    | 0    | 0    | 0    | 0.048            |
| 14                    | 4               | 3    | 4    | 2    | 3    | 0.172            |
| 18C                   | 0               | 2    | 0    | 0    | 0    | 0.435            |
| 19A                   | 6               | 9    | 11   | 4    | 9    | <b>0.003</b>     |
| 19F                   | 6               | 3    | 7    | 4    | 6    | 0.682            |
| 23F                   | 3               | 4    | 1    | 0    | 1    | 0.011            |
| <b>addPPV23</b>       |                 |      |      |      |      |                  |
| 8                     | 3               | 0    | 3    | 2    | 5    | 0.316            |
| 9N                    | 1               | 0    | 4    | 6    | 2    | 0.184            |
| 10A                   | 2               | 0    | 2    | 1    | 1    | 0.394            |
| 11A                   | 9               | 8    | 4    | 10   | 7    | 0.582            |
| 12F                   | 0               | 0    | 0    | 0    | 1    | 0.555            |
| 15B/C                 | 1               | 2    | 4    | 3    | 3    | 0.864            |
| 17F                   | 1               | 2    | 0    | 0    | 3    | 0.734            |
| 20                    | 0               | 1    | 1    | 0    | 2    | 0.087            |
| 22F                   | 6               | 3    | 3    | 7    | 6    | 0.398            |
| 33F                   | 0               | 0    | 0    | 0    | 0    | 0.035            |
| <b>NVT</b>            |                 |      |      |      |      |                  |
| 6C                    | 2               | 4    | 10   | 5    | 2    | 0.786            |
| 23A                   | 3               | 4    | 3    | 1    | 2    | 0.440            |
| 23B                   | 2               | 2    | 4    | 3    | 7    | 0.308            |
| NT                    | 1               | 3    | 2    | 1    | 2    | 0.021            |
| 15A                   | 2               | 3    | 4    | 2    | 4    | 0.632            |
| 31                    | 2               | 1    | 1    | 1    | 0    | 0.063            |
| 16F                   | 2               | 2    | 2    | 3    | 0    | 0.097            |
| 29/35B                | 2               | 1    | 2    | 4    | 2    | 0.974            |
| 35F                   | 0               | 0    | 1    | 1    | 1    | <b>0.003</b>     |
| 34                    | 0               | 0    | 0    | 1    | 2    | 0.023            |
| 21                    | 0               | 0    | 1    | 1    | 0    | 0.015            |
| 24F                   | 2               | 0    | 2    | 0    | 0    | 0.133            |
| 33A                   | 0               | 1    | 2    | 1    | 1    | 0.373            |
| 25A/38                | 1               | 2    | 1    | 0    | 0    | 0.024            |

|                     |     |     |     |     |     |       |
|---------------------|-----|-----|-----|-----|-----|-------|
| 13                  | 1   | 0   | 0   | 1   | 1   | 0.600 |
| Others <sup>c</sup> | 3   | 4   | 1   | 2   | 2   | -     |
| Total               | 100 | 100 | 100 | 100 | 100 | -     |

<sup>a</sup>NVT, non-vaccine serotypes, i.e., serotypes not included in any of the currently available pneumococcal vaccines.

<sup>b</sup>CA, Cochran Armitage test of trend. In bold are the serotypes with significant p-value ( $p < 0.05$ ) after FDR correction.

<sup>c</sup>Only serotypes detected in  $\geq 3$  isolates or in at least 2 years are shown; the remaining are grouped together under “Others.”
