# Supplementary material for: Conjugate vaccine serotypes persist as major causes of non-invasive pneumococcal pneumonia in Portugal despite declines in serotypes 3 and 19A (2012-2015)
Source: PubMed Central journal article supplement (PMC6214563; doi:10.1371/journal.pone.0206912), 2018-11-02
Supplement: pone.0206912.s004.pdf [file pone.0206912.s004.pdf]

**S2 Table. Serotype distribution of the isolates causing non-invasive pneumococcal pneumonia and invasive pneumococcal disease in adults in Portugal (2012–2014).**

| Serotype | n (%) <sup>a</sup> |              | OR <sup>b</sup> | CI <sub>95%</sub> | p value <sup>c</sup> |
|----------|--------------------|--------------|-----------------|-------------------|----------------------|
|          | NIPP (n=998)       | IPD (n=1163) |                 |                   |                      |
| 3        | 143 (14.3)         | 161 (13.8)   | 1.1             | (0.8-1.3)         | 0.757                |
| 11A      | 80 (8.0)           | 49 (4.2)     | 2.0             | (1.4-2.9)         | <b>&lt;0.001</b>     |
| 19F      | 59 (5.9)           | 27 (2.3)     | 2.6             | (1.6-4.4)         | <b>&lt;0.001</b>     |
| 23A      | 50 (5.0)           | 26 (2.2)     | 2.3             | (1.4-3.9)         | <b>0.001</b>         |
| 19A      | 44 (4.4)           | 84 (7.2)     | 0.6             | (0.4-0.9)         | <b>0.006</b>         |
| 6C       | 42 (4.2)           | 28 (2.4)     | 1.8             | (1.1-3.0)         | 0.020                |
| 9N       | 40 (4.0)           | 39 (3.4)     | 1.2             | (0.7-1.9)         | 0.424                |
| 23B      | 38 (3.8)           | 12 (1.0)     | 3.8             | (1.9-8.0)         | <b>&lt;0.001</b>     |
| 31       | 36 (3.6)           | 11 (0.9)     | 3.9             | (1.9-8.6)         | <b>&lt;0.001</b>     |
| NT       | 33 (3.3)           | 10 (0.9)     | 3.9             | (1.9-9.0)         | <b>&lt;0.001</b>     |
| 22F      | 28 (2.8)           | 79 (6.8)     | 0.4             | (0.2-0.6)         | <b>&lt;0.001</b>     |
| 15A      | 27 (2.7)           | 27 (2.3)     | 1.2             | (0.7-2.1)         | 0.583                |
| 14       | 24 (2.4)           | 73 (6.3)     | 0.4             | (0.2-0.6)         | <b>&lt;0.001</b>     |
| 15B/C    | 24 (2.4)           | 22 (1.9)     | 1.3             | (0.7-2.4)         | 0.456                |
| 29/35B   | 24 (2.4)           | 26 (2.1)     | 1.1             | (0.6-2.0)         | 0.886                |
| 8        | 23 (2.3)           | 123 (10.6)   | 0.2             | (0.1-0.3)         | <b>&lt;0.001</b>     |
| 10A      | 22 (2.2)           | 18 (1.5)     | 1.4             | (0.7-2.9)         | 0.267                |
| 16F      | 20 (2.0)           | 23 (2.0)     | 1.0             | (0.5-1.9)         | 1                    |
| 17F      | 20 (2.0)           | 9 (0.8)      | 2.6             | (1.1-6.6)         | <b>0.015</b>         |
| 6A       | 18 (1.8)           | 7 (0.6)      | 3.0             | (1.2-8.6)         | <b>0.014</b>         |
| 20       | 16 (1.6)           | 39 (3.4)     | 0.5             | (0.2-0.9)         | <b>0.009</b>         |
| 21       | 16 (1.6)           | 0 (0)        | Inf             | (4.5-inf)         | <b>&lt;0.001</b>     |
| 34       | 16 (1.6)           | 8 (0.7)      | 2.4             | (0.9-6.4)         | 0.062                |
| 6B       | 15 (1.5)           | 15 (1.3)     | 1.2             | (0.5-2.6)         | 0.715                |
| 35F      | 14 (1.4)           | 13 (1.1)     | 1.3             | (0.5-2.9)         | 0.566                |
| 7F       | 13 (1.3)           | 61 (5.2)     | 0.2             | (0.1-0.4)         | <b>&lt;0.001</b>     |
| 24F      | 12 (1.2)           | 23 (2.0)     | 0.6             | (0.3-1.3)         | 0.173                |
| 33A      | 12 (1.2)           | 9 (0.8)      | 1.6             | (0.6-4.2)         | 0.381                |
| 7C       | 10 (1.0)           | 6 (0.5)      | 2.0             | (0.6-6.6)         | 0.215                |
| 23F      | 10 (1.0)           | 13 (1.1)     | 0.9             | (0.3-2.2)         | 0.836                |
| 25A/38   | 9 (0.9)            | 8 (0.7)      | 1.3             | (0.4-3.9)         | 0.631                |
| 35A      | 9 (0.9)            | 2 (0.2)      | 5.3             | (1.1-50.3)        | 0.029                |
| 13       | 6 (0.6)            | 2 (0.2)      | 3.5             | (0.6-35.6)        | 0.155                |
| 18C      | 6 (0.6)            | 7 (0.6)      | 1.0             | (0.3-3.5)         | 1                    |
| 37       | 6 (0.6)            | 0 (0)        | Inf             | (1.4-inf)         | <b>0.010</b>         |
| 9V       | 5 (0.5)            | 9 (0.8)      | 0.6             | (0.2-2.2)         | 0.593                |
| 4        | 4 (0.4)            | 23 (2.0)     | 0.2             | (0.1-0.6)         | <b>0.001</b>         |
| 12B      | 3 (0.3)            | 18 (1.5)     | 0.2             | (0-0.7)           | <b>0.003</b>         |

| Serotype | n (%) <sup>a</sup> |              | OR <sup>b</sup> | CI <sub>95%</sub> | p value <sup>c</sup> |
|----------|--------------------|--------------|-----------------|-------------------|----------------------|
|          | NIPP (n=998)       | IPD (n=1163) |                 |                   |                      |
| 17A      | 3 (0.3)            | 0 (0)        | Inf             | (0.5-inf)         | 0.098                |
| 1        | 2 (0.2)            | 26 (2.2)     | 0.1             | (0-0.4)           | <b>&lt;0.001</b>     |
| 10B      | 2 (0.2)            | 0 (0)        | Inf             | (0.2-inf)         | 0.213                |
| 10F      | 2 (0.2)            | 1 (0.1)      | 2.3             | (0.1-137.7)       | 0.599                |
| 11B      | 2 (0.2)            | 2 (0.2)      | 1.2             | (0.1-16.1)        | 1                    |
| 18A      | 2 (0.2)            | 3 (0.3)      | 0.8             | (0.1-6.8)         | 1                    |
| 33F      | 2 (0.2)            | 3 (0.3)      | 0.8             | (0.1-6.8)         | 1                    |
| 47F      | 2 (0.2)            | 1 (0.1)      | 2.3             | (0.1-137.7)       | 0.599                |
| 28A      | 1 (0.1)            | 1 (0.1)      | 1.2             | (0-91.5)          | 1                    |
| 35C      | 1 (0.1)            | 0 (0)        | Inf             | (0-inf)           | 0.462                |
| 36       | 1 (0.1)            | 0 (0)        | Inf             | (0-inf)           | 0.462                |
| 42       | 1 (0.1)            | 0 (0)        | Inf             | (0-inf)           | 0.462                |
| 5        | 0 (0)              | 1 (0.1)      | 0               | (0-45.4)          | 1                    |
| 6D       | 0 (0)              | 1 (0.1)      | 0               | (0-45.4)          | 1                    |
| 12A      | 0 (0)              | 2 (0.2)      | 0               | (0-6.2)           | 0.503                |
| 16A      | 0 (0)              | 2 (0.2)      | 0               | (0-6.2)           | 0.503                |
| 18F      | 0 (0)              | 2 (0.2)      | 0               | (0-6.2)           | 0.503                |
| 19B      | 0 (0)              | 1 (0.1)      | 0               | (0-45.4)          | 1                    |
| 22A      | 0 (0)              | 1 (0.1)      | 0               | (0-45.4)          | 1                    |
| 24A      | 0 (0)              | 2 (0.2)      | 0               | (0-6.2)           | 0.502                |
| 24B      | 0 (0)              | 1 (0.1)      | 0               | (0-45.4)          | 1                    |
| 33B      | 0 (0)              | 2 (0.2)      | 0               | (0-6.2)           | 0.503                |
| 39       | 0 (0)              | 1 (0.1)      | 0               | (0-45.4)          | 1                    |

<sup>a</sup>IPD - invasive pneumococcal disease. NIPP – non-invasive pneumococcal pneumonia. Data from IPD were published previously [6].

<sup>b</sup>Odds ratios and 95% confidence intervals (CI<sub>95%</sub>) were used to measure the association between serotype and disease presentation.

<sup>c</sup>In bold are significant p-values (p<0.05) after FDR correction.
